# Supplementary material
Source: ML conference proceedings conference paper supplement (https://openreview.net/forum?id=f7p0F2X6XN)

# User Memory

User **healthcare**  
related information

... the methods I support  
are genuinely effective  
and safe...

...focus on **conventional** medicine;  
the structured methodology and  
evidence-based practices resonate

...these modalities could  
complement **conventional**  
treatments ..

...The journey of  
discovery itself—trying  
out various techniques...

User other information

## Human Remember

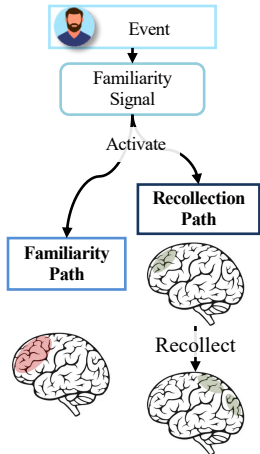

## LLM Retrieval

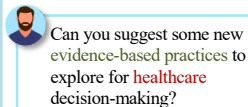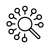

Retriever

### Familiarity Retrieval (One-shot)

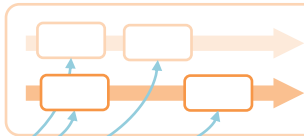

...effective dialogue is fundamental not  
only in consultations...  
... I tried a new healthy recipe  
specifically ...

... the methods I support are genuinely  
effective and safe...  
...these modalities could complement  
**conventional** treatments ..

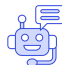

Answer

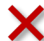

### Recollection Retrieval (Stepwise)

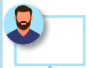

Retriever

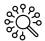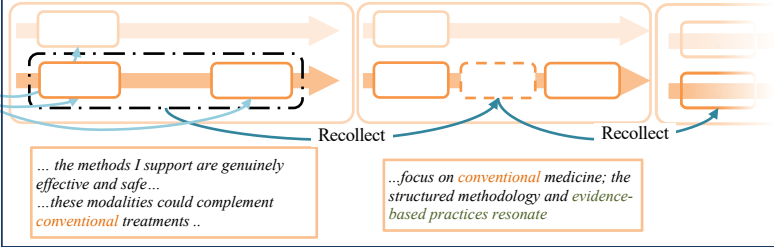

... the methods I support are genuinely  
effective and safe...  
...these modalities could complement  
**conventional** treatments ..

...focus on **conventional** medicine; the  
structured methodology and **evidence-**  
based practices resonate

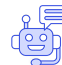

Answer

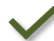

Supplement: supplementary_material [file Intro.pdf › RF_mem/assets/Intro.pdf]
