# Supplementary material
Source: ML conference proceedings conference paper supplement (https://openreview.net/forum?id=f7p0F2X6XN)

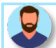

# ① User Question

## ② *Recollection-Familiarity Memory Retrieval (RF-Mem)*

### *Familiarity Uncertainty-Driven Retrieval Selection*

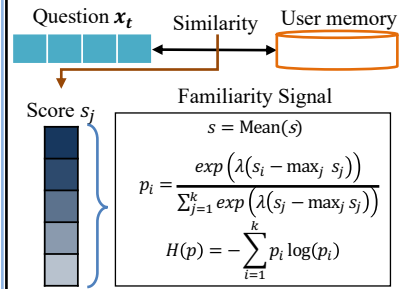

## ③ Retrieved Memory

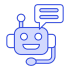

## ④ LLM Answer

$s \geq \theta_{\text{high}}$   
 $H(p) \leq \tau$

$s \leq \theta_{\text{low}}$   
 $H(p) > \tau$

### *Familiarity Retrieval*

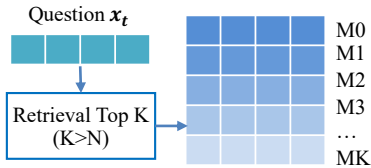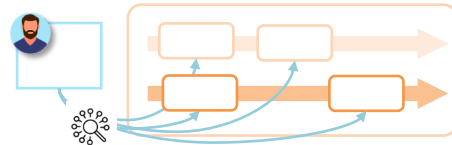

### *Recollection Retrieval*

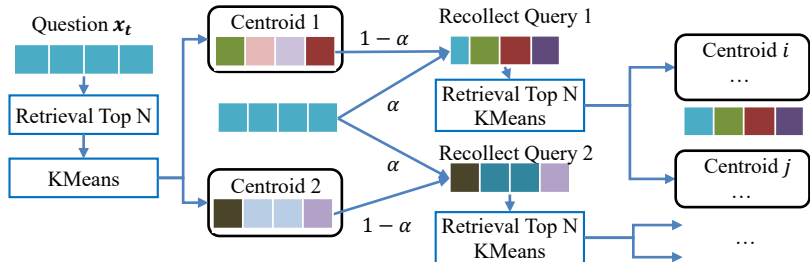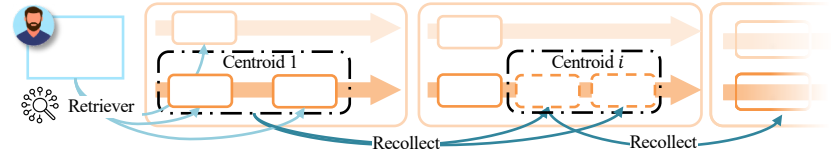

Supplement: supplementary_material [file framework.pdf › RF_mem/assets/framework.pdf]
